# Supplementary material for: Effect of the Drying Method and Storage Conditions on the Quality and Content of Selected Bioactive Compounds of Green Legume Vegetables
Source: MDPI journal article supplement (doi:10.3390/molecules29081732), 2024-04-11
Supplement: s1 [file s1]

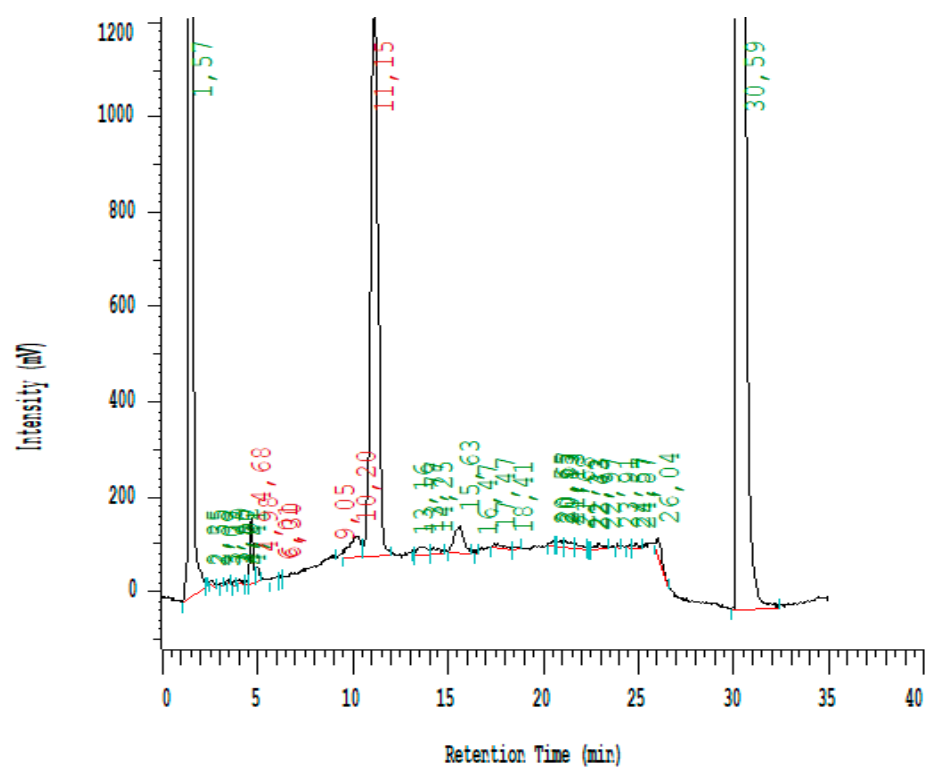

**Figure S2.** The chromatogram of tocopherols in raw green peas; retention time: 4 min –  $\alpha$ -tocopherol, 10 min –  $\beta$ -tocopherol, 11 min –  $\gamma$ -tocopherol.
